# Supplementary material for: A Novel Quantitative Computer-Assisted Score Can Improve Repeatability in the Estimate of Vascular Calcifications at the Abdominal Aorta
Source: MDPI journal article supplement (doi:10.3390/nu14204276), 2022-10-13

**Figure S1. Bland-Altman plots of the intra-operator differences in the estimate of calcification scores between repetitions R1 and R2 (pooled data are presented in Figure 2 in the main text)**

**Semiquantitative Visual (SV) score**

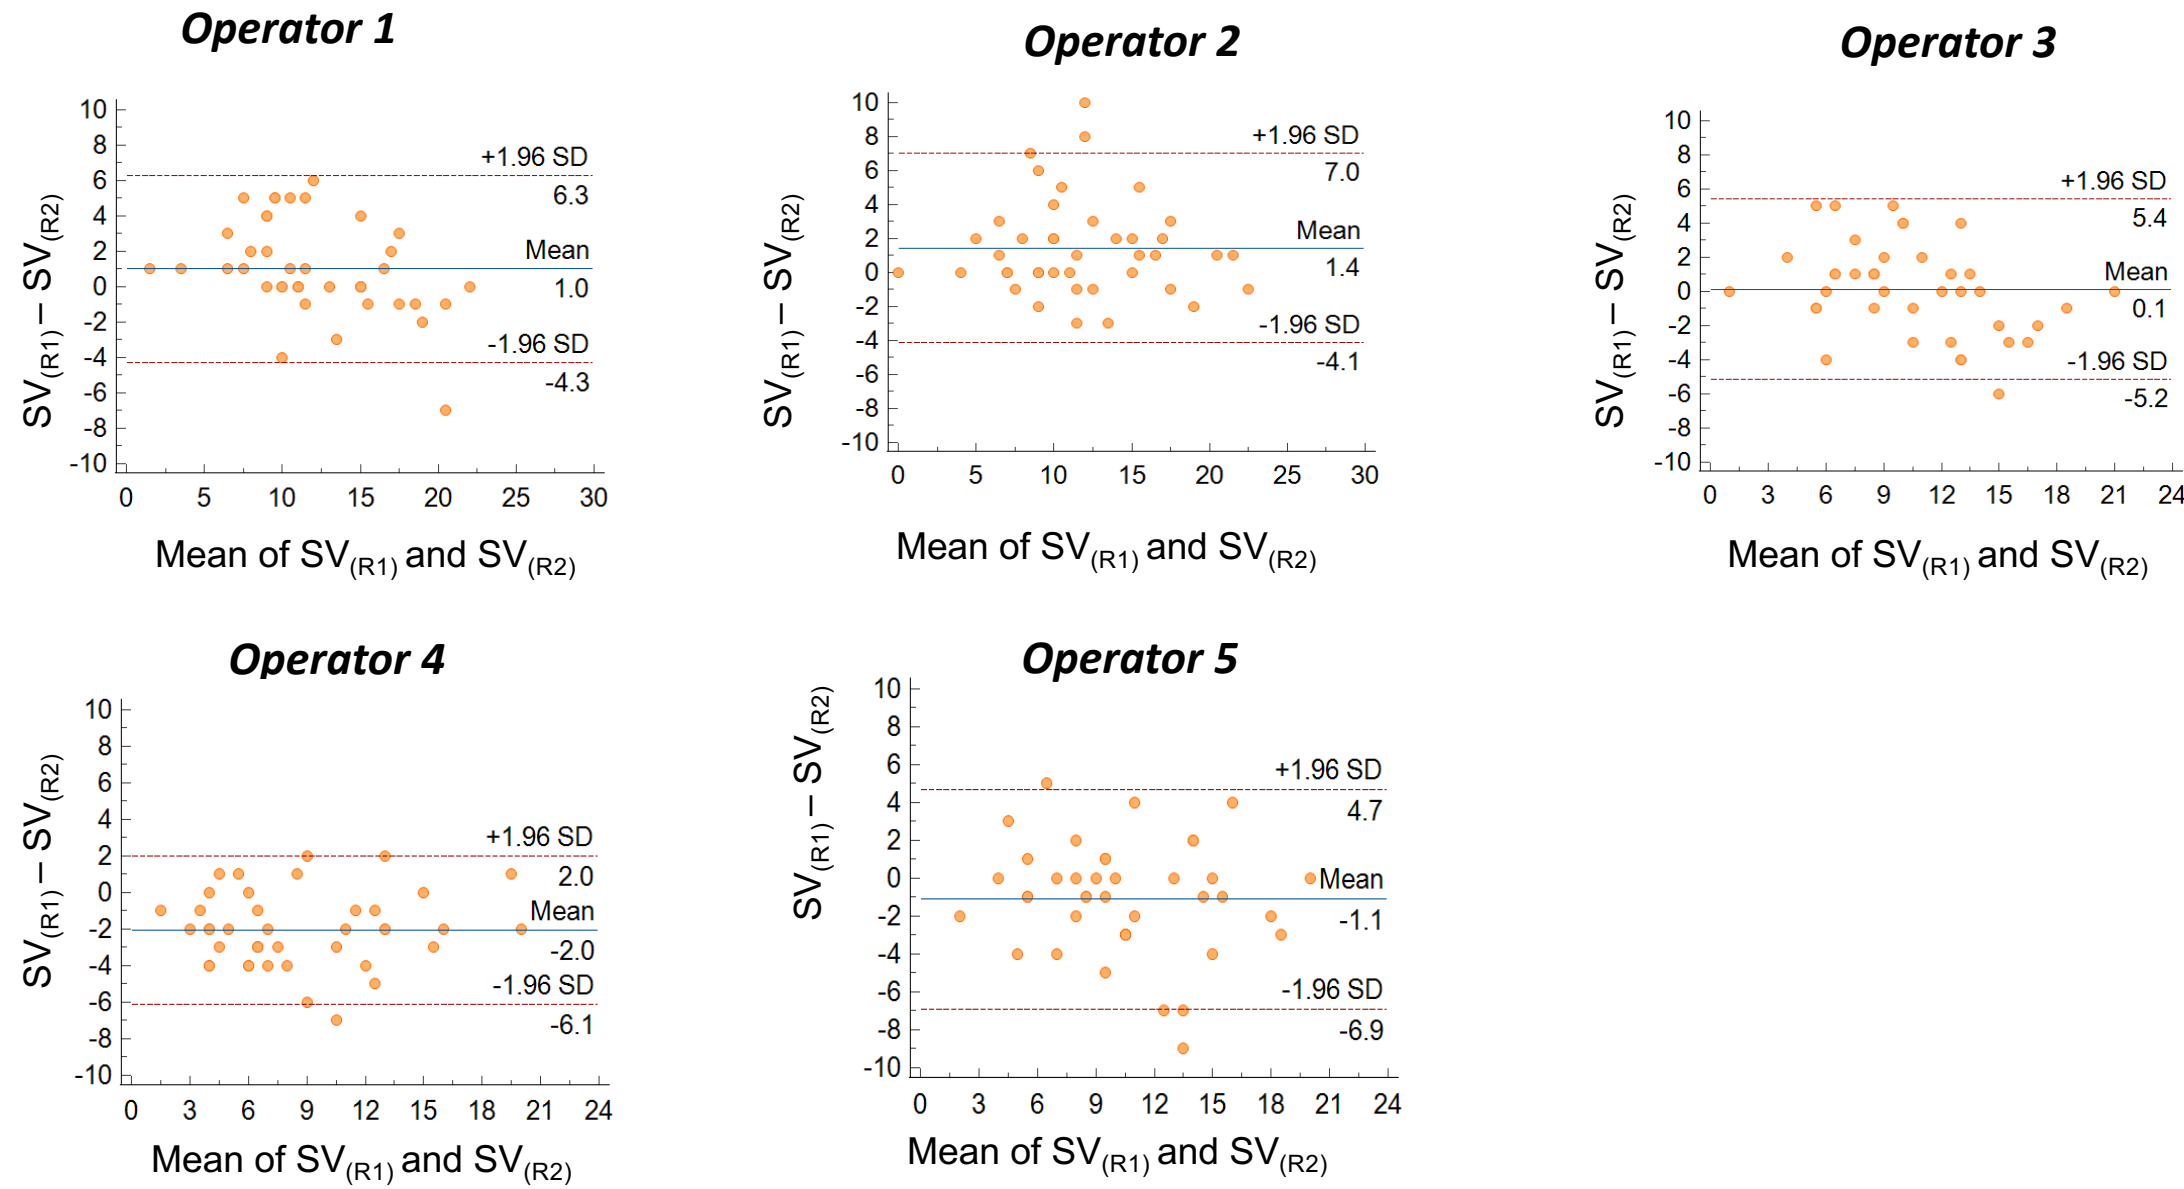

**Figure S2. Bland-Altman plots of the intra-operator differences in the estimate of calcification scores between repetitions R1 and R2 (pooled data are presented in Figure 2 in the main text)**

**Quantitative Computer-assisted (QC) score**

**Operator 1**

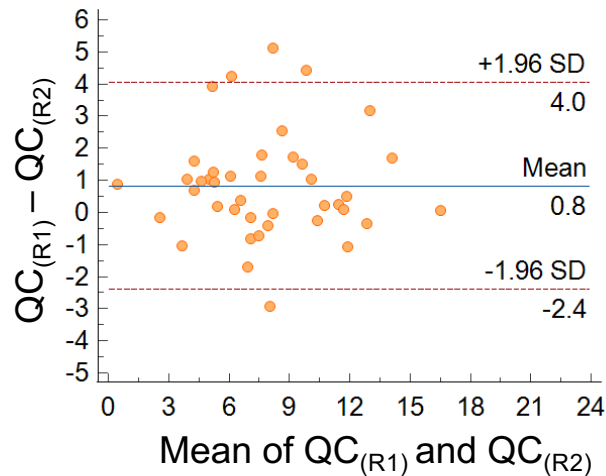

**Operator 2**

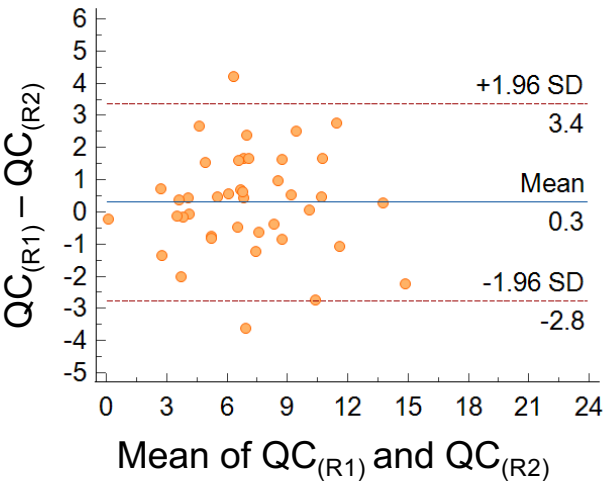

**Operator 3**

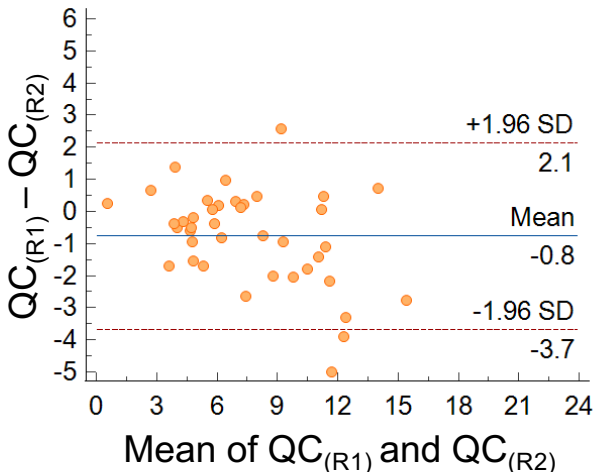

**Operator 4**

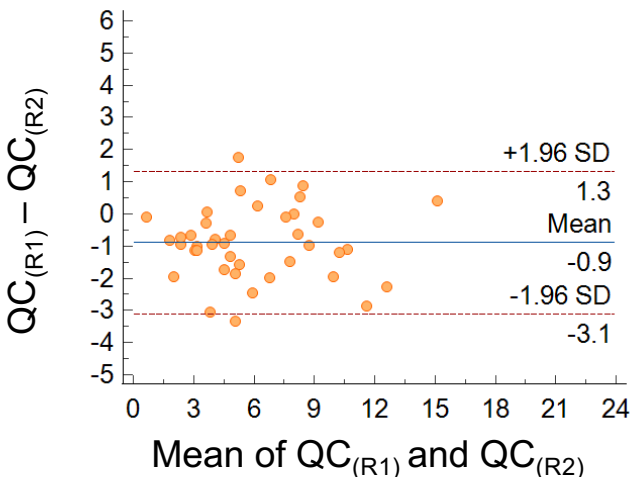

**Operator 5**

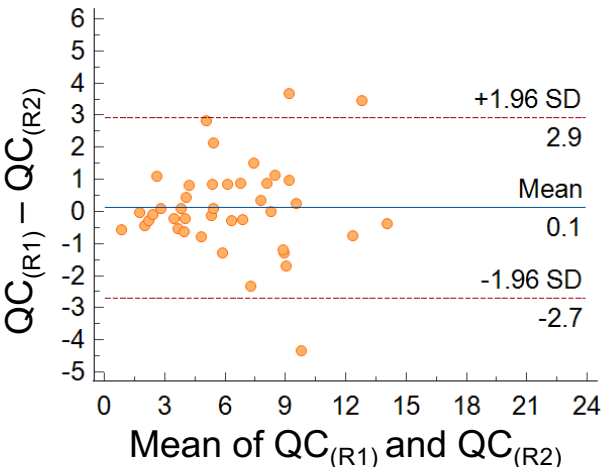

**Figure S3. Bland-Altman plots of the intra-operator differences in the estimate of calcification scores between repetitions R1 and R2 (pooled data are presented in Figure 2 in the main text)**

**Semiquantitative Computer-assisted (SC) score**

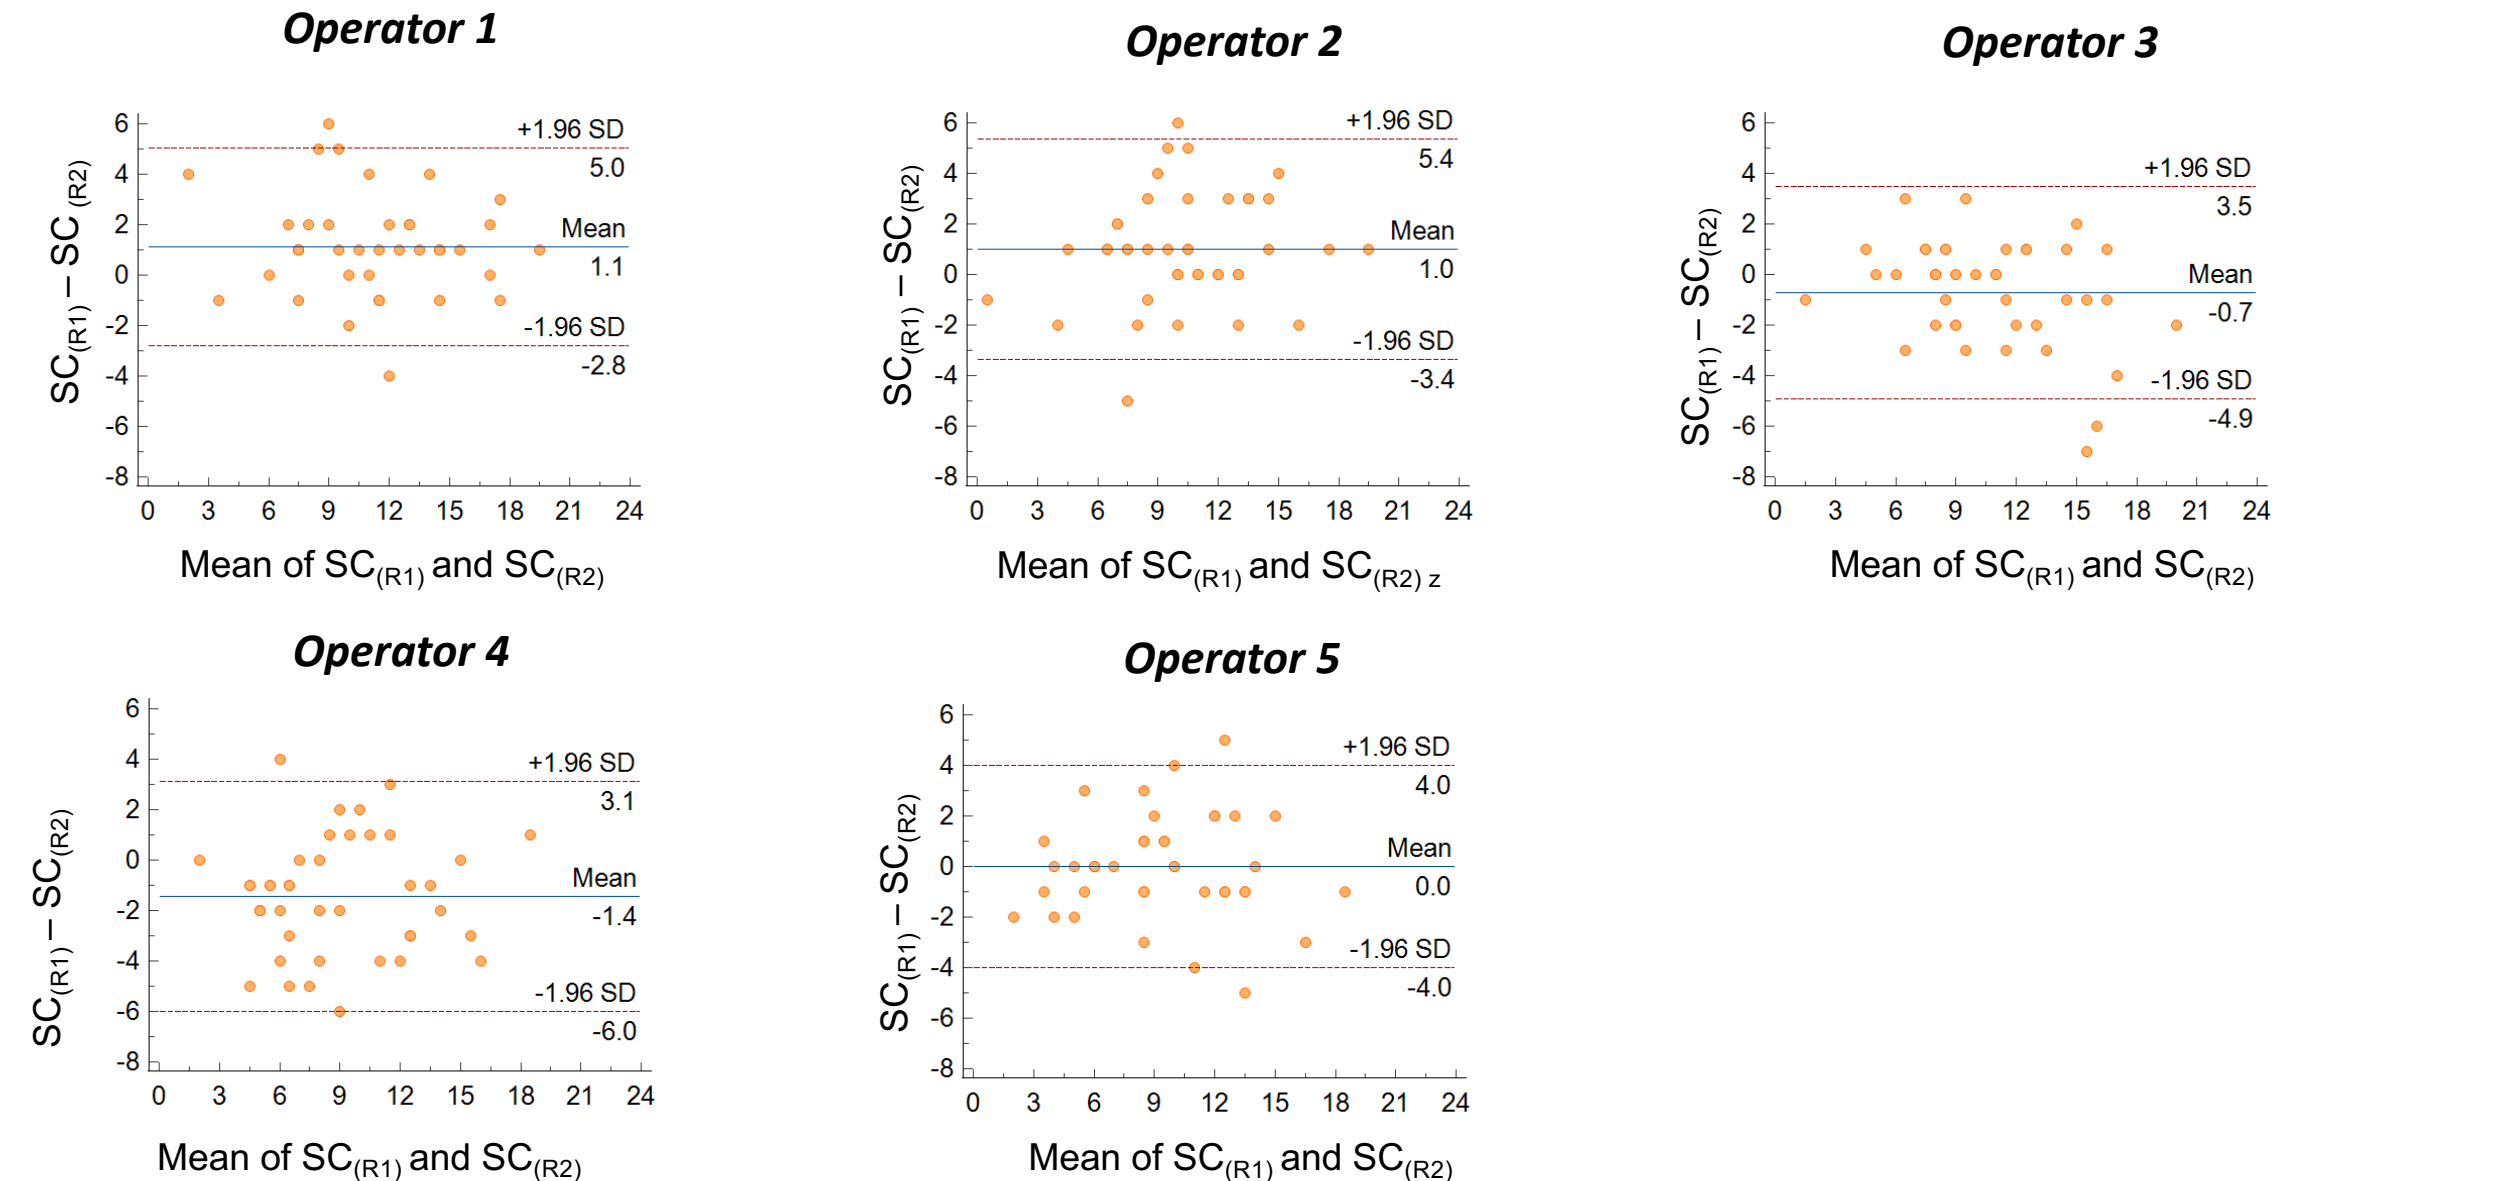

**Figure S4. Per-operator regression plots of the estimates of calcification scores in repetitions R1 and R2 (pooled data are presented in Figure 2 in the main text)**

**Semiquantitative Visual (SV) score**

**Operator 1**

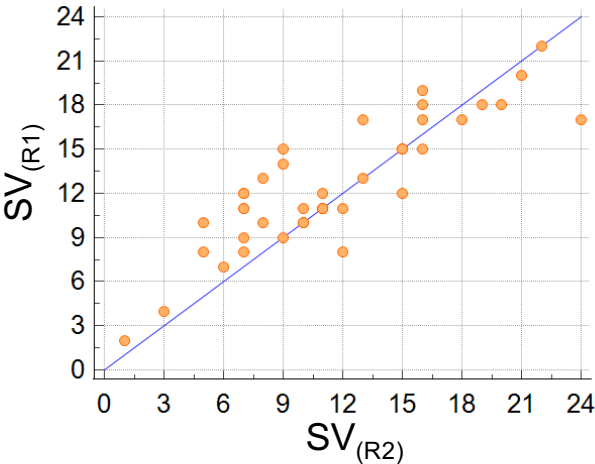

**Operator 2**

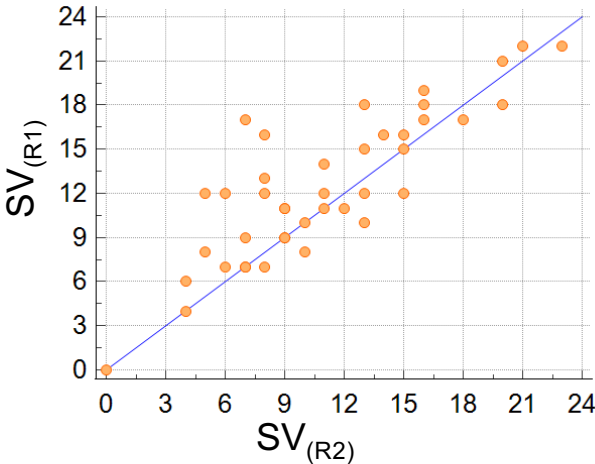

**Operator 3**

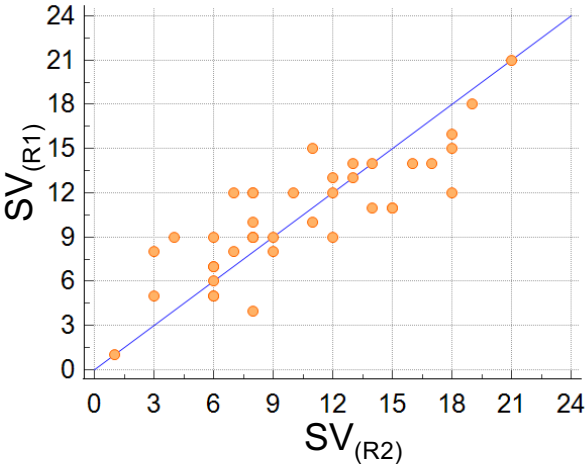

**Operator 4**

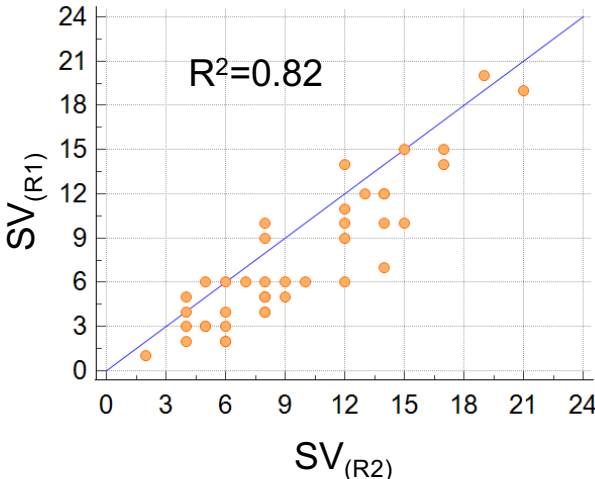

**Operator 5**

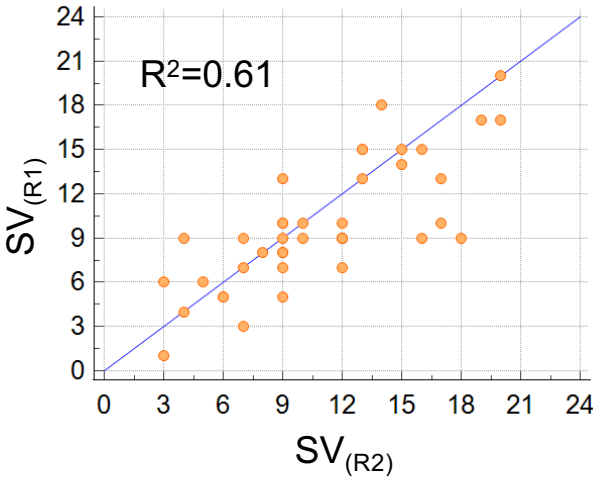

**Figure S5. Per-operator regression plots of the estimates of calcification scores in repetitions R1 and R2 (pooled data are presented in Figure 2 in the main text)**

**Quantitative Computer-assisted (QC) score**

***Operator 1***

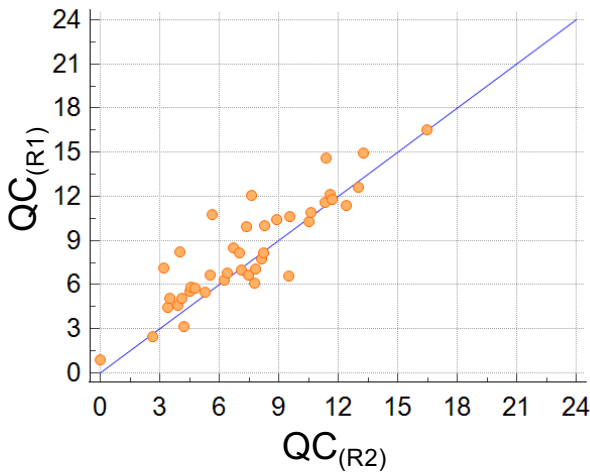

***Operator 2***

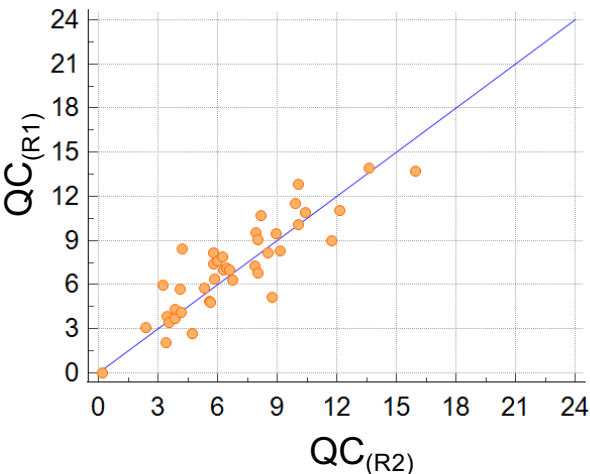

***Operator 3***

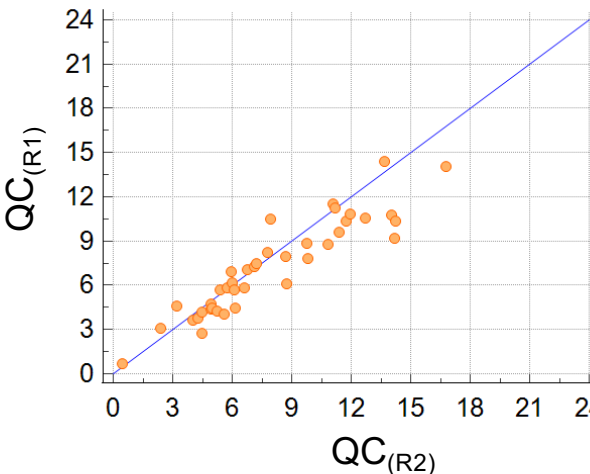

***Operator 4***

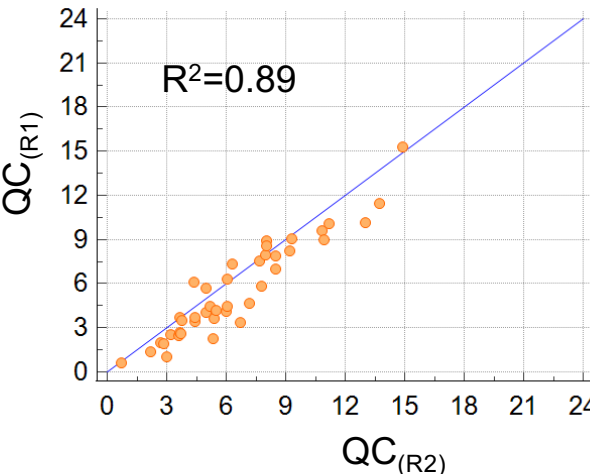

***Operator 5***

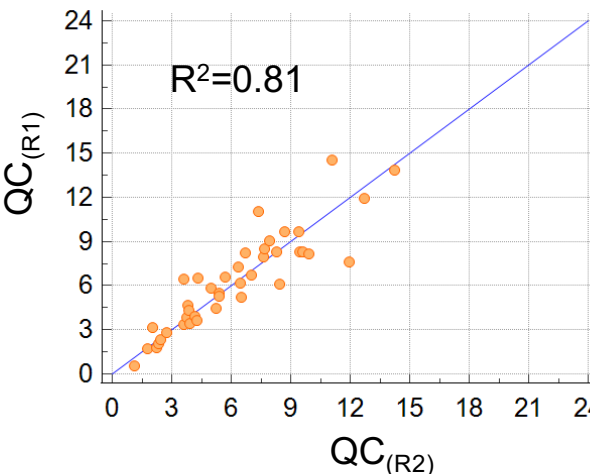

**Figure S6. Per-operator regression plots of the estimates of calcification scores in repetitions R1 and R2 (pooled data are presented in Figure 2 in the main text)**

**Semiquantitative Computer-assisted (SC) score**

**Operator 1**

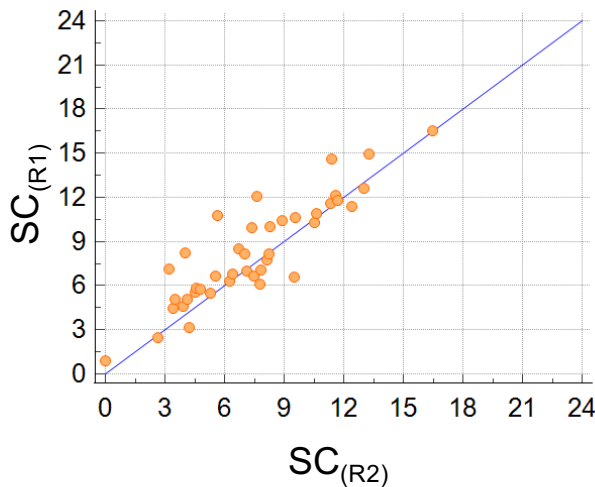

**Operator 2**

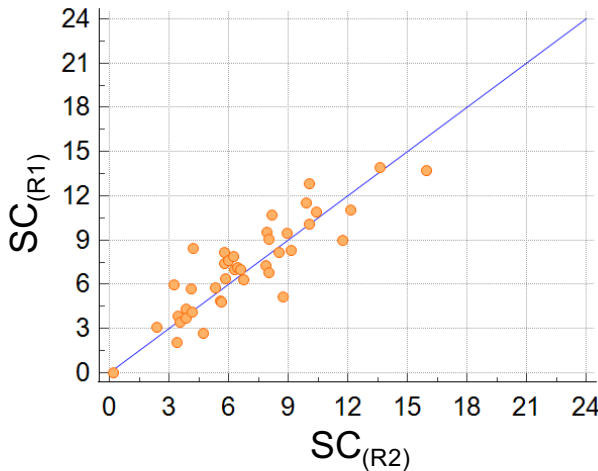

**Operator 3**

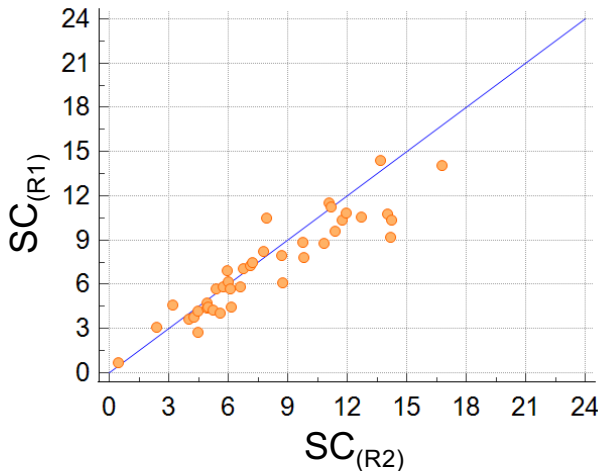

**Operator 4**

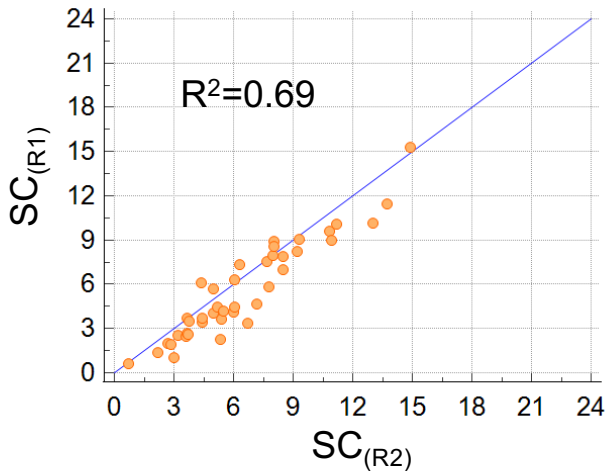

**Operator 5**

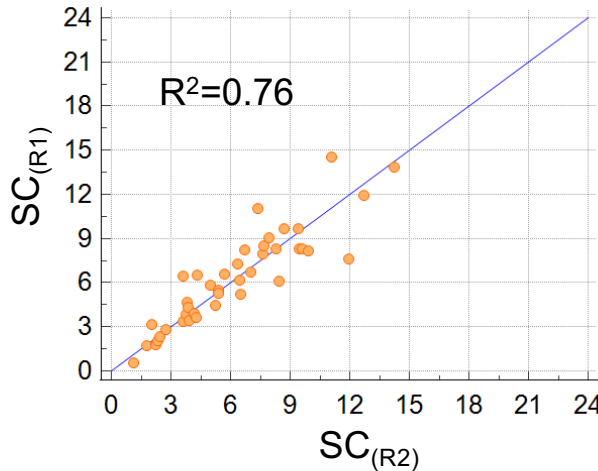

Supplement: s1 [file s1]
